# Supplementary material for: The Use of Mumsnet by Parents of Young People With Mental Health Needs: Qualitative Investigation
Source: PubMed Central journal article supplement (PMC7499161; doi:10.2196/18271), 2020-09-03

Multimedia Appendix 1 : Domains, themes and subthemes.

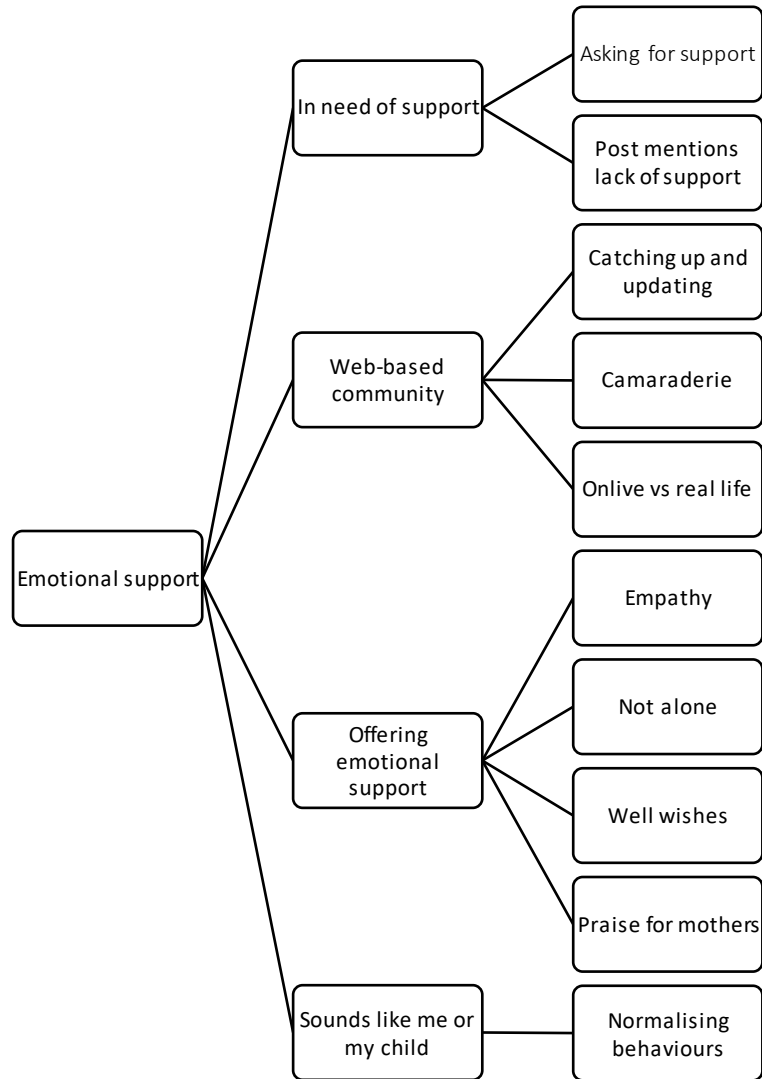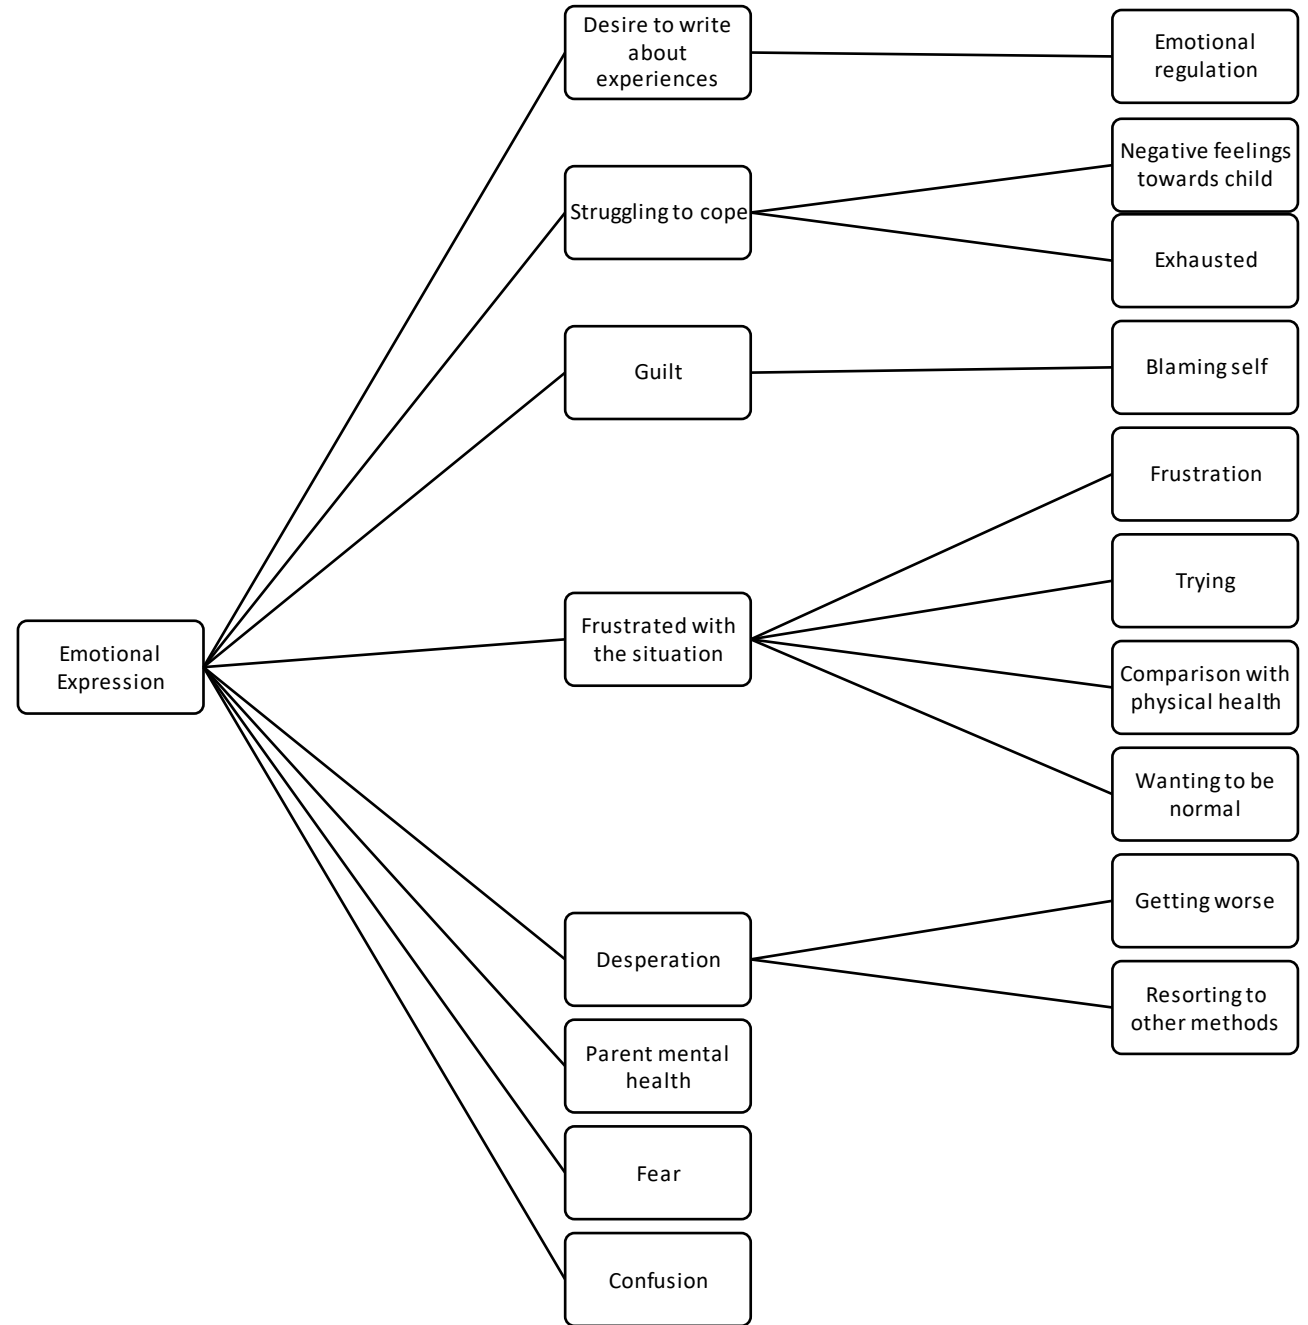

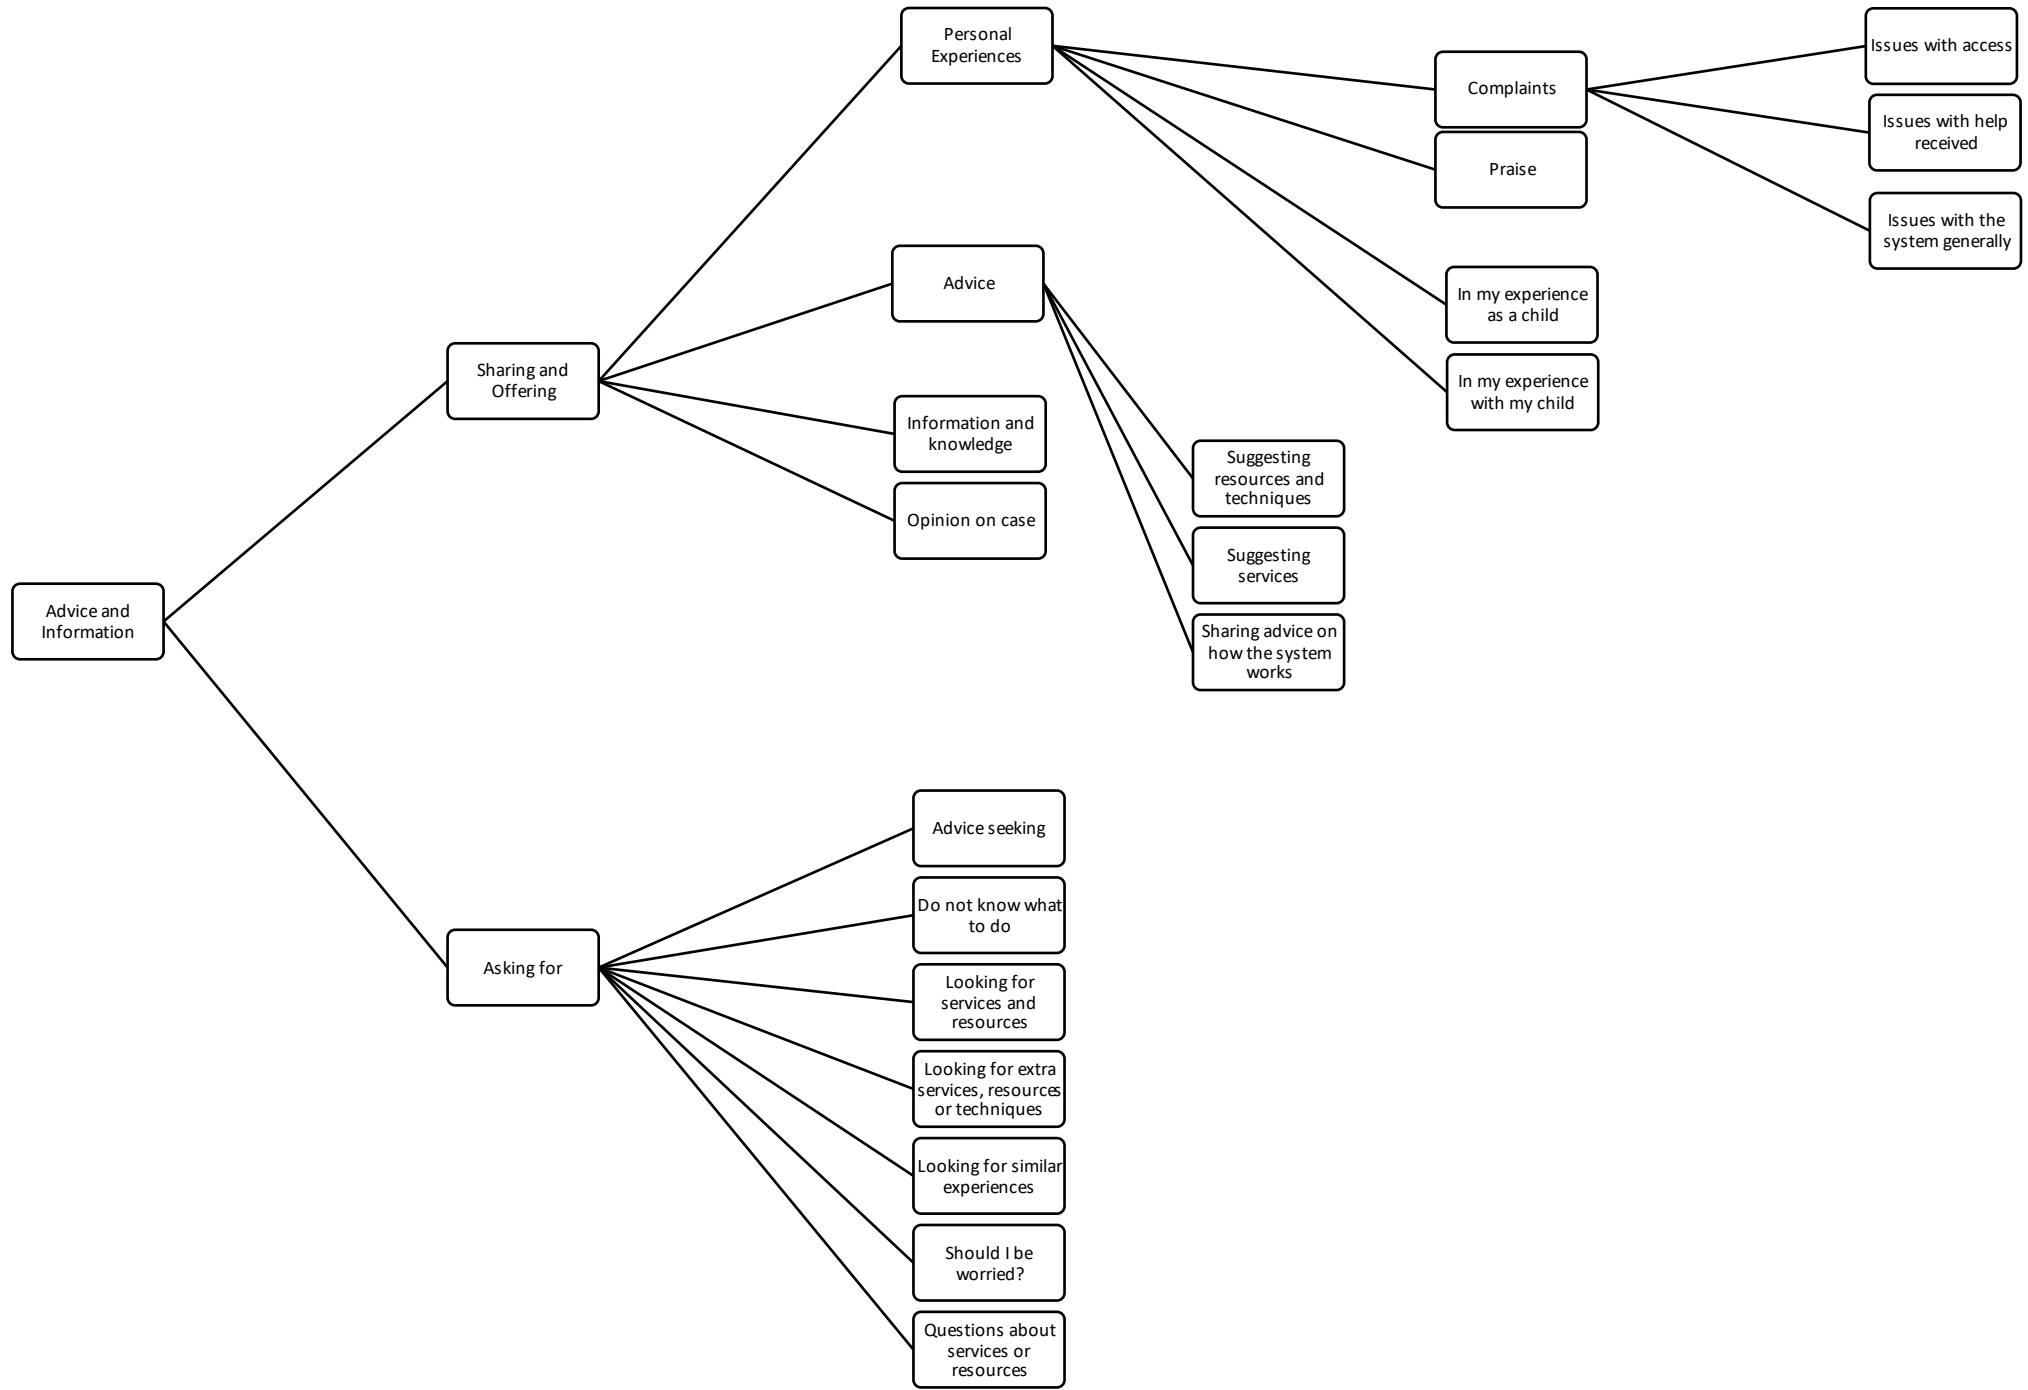

Supplement: mental_v7i9e18271_app1.pdf [file mental_v7i9e18271_app1.pdf]
